# Supplementary material for: Maastrichtian–Rupelian paleoclimates in the southwest Pacific – a critical re-evaluation of biomarker paleothermometry and dinoflagellate cyst paleoecology at Ocean Drilling Program Site 1172
Source: Copernicus journal article supplement (doi:10.5194/cp-17-2393-2021), 2021-11-25
Supplement: Supplementary file 1 [file cp-17-2393-2021-supplement.zip]

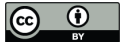

*Supplement of*

**Maastrichtian–Rupelian paleoclimates in the southwest Pacific –  
a critical re-evaluation of biomarker paleothermometry and  
dinoflagellate cyst paleoecology at Ocean Drilling  
Program Site 1172**

**Peter K. Bijl et al.**

*Correspondence to:* Peter K. Bijl (p.k.bijl@uu.nl)

- cp-17-2393-2021-supplement-title-page.pdf
- Supplements
  - Table S1.xlsx
  - Table S2.xlsx

The copyright of individual parts of the supplement might differ from the article licence.
